# Supplementary material for: Craniocervical instability in patients with Ehlers-Danlos syndromes: outcomes analysis following occipito-cervical fusion
Source: Springer Nature journal article supplement (doi:10.1007/s10143-023-02249-0), 2024-01-02
Supplement: MOESM1 [file 26582382]

**Surgical Decision Tree: EDS with Suspected Upper Cervical Spine Instability**

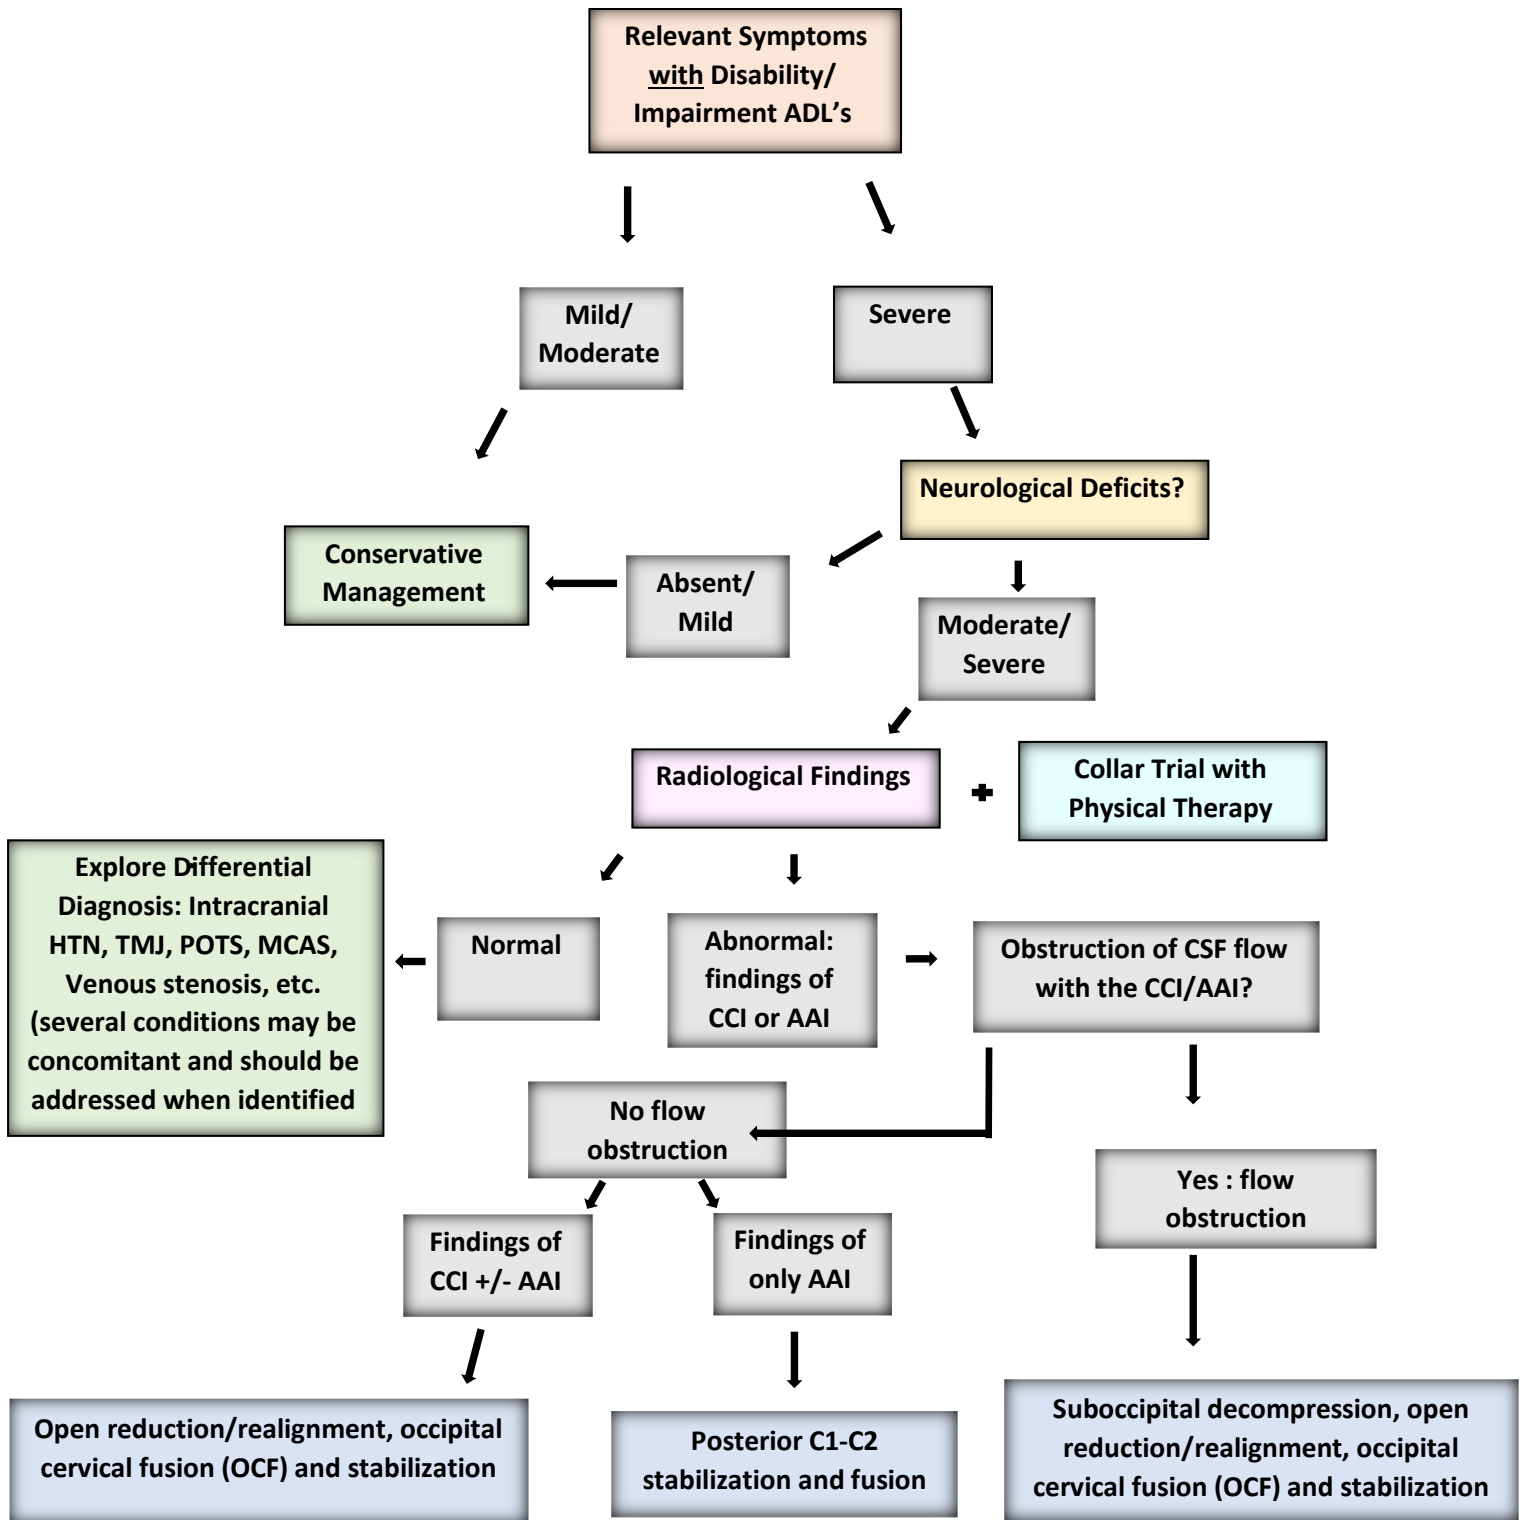

### Symptoms

Symptoms of cervicomedullary syndrome : severe headache, neck pain, fatigue, dizziness, vertigo, syncopal episodes, upper and lower extremity weakness and numbness, imbalance, night awakenings, memory difficulties, brain fog, walking and balance problems, sensory changes, visual problems, altered hearing, speech impediments, dysphagia, and micturition issues.

Symptoms of CM1 or Complex Chiari: suboccipital tussive headache exacerbated by Valsalva, cough or straining-dizziness, neck pain, syncope elements of cerebellar dysfunction (dysarthria, incoordination, imbalance, and unsteady gait), lower cranial nerve deficits, hearing and vestibular deficits, Romberg's sign and gait problems. There is often ephemer facial pain [Milhorat et al., 1999; Tubbs et al., 2011a; Yarbrough et al., 2011]. Brainstem including sleep apnea and dysautonomia, are often found in CM complicated by craniocervical instability or basilar invagination, the "complex Chiari," .

Symptoms of AAI: Headaches (particularly suboccipital or occipital nerve), neck pain, syncope or presyncope, visual changes (e.g. teichopsia, "tunnel" vision, "brownouts" or severe blurring episodes), intermittent dysesthesias of the trunk and extremities, dizziness/lightheadedness, nausea, facial pain, dysphagia, choking, and respiratory issues.

### Neurological Deficits

Hypoesthesia to pinprick (over most of cervical, thoracic, lumbar and sacral dermatomes), facial numbness, hyperreflexia (may see hyporeflexia in the context of Vit B12 deficiency), upper or lower extremity weakness, proprioception or vibratory sensation may be decreased, dysdiadochokinesia, Romberg sign, and impairment of tandem gait , tenderness over C1/C2 produces pain/nausea/increased neurological deficits

### Radiological Findings

*Upright, weight bearing MRI with flexion and extension-*

CSF flow obstruction: stenosis of foramen magnum , CM1 ( $\geq 5\text{mm}$ ) or Low Lying Cerebellar Tonsils (3-5mm)

Abnormal findings for CCI:

Clivoaxial angle  $< 135^\circ$

Horizontal Harris (BAI)  $\geq 12\text{mm}$  or translation  $\geq 4\text{mm}$

BpC2/ Grabb Oakes measurement pBC2  $\geq 9\text{mm}$

CC2SV measurement  $> 5\text{ mm}$

AAI- Retro-odontoid pannus

*Dynamic CT with head rotation  $90^\circ$  to the left and to the right-* Rotation of C1 upon C2  $\geq 41^\circ$

\*Flexion/Extension and Rotation must be done sufficiently to ensure accurate readings. If readings are normal, make sure images were taken properly to decide if they may need to be repeated or additional imaging warranted (see below).

### Additional Imaging:

*Digital Motion Xray-* Lateral translation

significant change in the para-odontoid space

significant overhang of the lateral mass of C1 bilaterally

**Collar Trial and Physical Therapy:** Collar should improve symptoms (However, the collar may worsen the pain if it presses on C1C2 or upon the mandible in presence of TMJ dysfunction); PT should be performed under EDS experienced therapist (isometrics, posture training, etc.)
